# Supplementary material for: Waste Is the New Wealth – Recovering Resources From Poultry Wastewater for Multifunctional Microalgae Feedstock
Source: Frontiers journal article supplement (doi:10.3389/fenvs.2021.679917), 2021-07-06
Supplement: Table_1.DOCX [file Table_1.DOCX]

Supplementary Material

**Table S1. Tap water physicochemical properties**. *Source*: Pidpa, supply zone 7 (01/01/2019 – 01/01/2020).

| **Parameter** | **Median level** | **Unit** |
| --- | --- | --- |
| *Clostridium perfringens* | <1 |  |
| *Enterococcus sp.* | <1 | CFU/100 mL |
| *Escherichia coli* | <1 | CFU/100 mL |
| Total Coliforms | <1 | CFU/100 mL |
| Aggressivity index | -0.5 |  |
| Electrical conductivity | 214 | µS/cm |
| m-alkalinity | 1.79 | Mmol/L |
| pH | 8.2 |  |
| Total hardness (calculated) | 6.0 | °F |
| Temporary hardness (calculated) | 4.8 | °F |
| Quantitative color | < 2.0 | Mg/L Pt |
| Quantitative turbidity | < 0.10 | NTU |
| 1,2-dichloroethane | <0.25 | µg/L |
| Al | <2 | µg/L |
| Ammonium | < 0.05 | mg/L |
| As | 1.3 | µg/L |
| B | 32 | µg/L |
| Benzene | <0.20 | µg/L |
| Benzo(a)pyrene | <0.3 | ng/L |
| Bicarbonates (calculated) | 108 | mg/L |
| Bromates | <2.0 | µg/L |
| Bromodichloromethane | <0.50 | µg/L |
| Ca | 19.4 | mg/L |
| Carbonates (calculated) | 0.72 | mg/L |
| Cd | <0.02 | µg/L |
| Chlorate | <50.0 | µg/L |
| Chlorides | 13.4 | mg/L |
| Chlorite | <50.0 | µg/L |
| Cr | <0.5 | µg/L |
| Cu | 0.5 | µg/L |
| Cyanide | <3 | µg/L |
| Dissolved fluorides | 94 | µg/L |
| Dissolved oxygen | 9.7 | Mg/L |
| Fe | <0.005 | mg/L |
| Free Cl2 | <50 | µg/L |
| Free CO2 (calculated) | 1.25 | mg/L |
| Group haloforms | <0.50 | µg/L |
| Hg | <0.05 | µg/L |
| Hydroxides (calculated) | < 0.10 | mg/L |
| K | 3.3 | mg/L |
| K-40 | 0.098 | Bq/L |
| Mg | 2.7 | mg/L |
| Mn | 1.1 | µg/L |
| Monomer acrylamide | <0.025 | µg/L |
| Na | 24.5 | mg/L |
| Ni | <0.5 | µg/L |
| Nitrate | 1.2 | mg/L |
| Nitrite | < 0.01 | mg/L |
| Pb | <0.2 | µg/L |
| Rn | 5.9 | Bq/L |
| Sb | <0.2 | µg/L |
| Se | <0.5 | µg/L |
| Si | 17.7 | mg/L |
| Styrene | <0.50 | µg/L |
| Sulphate | 10.4 | mg/L |
| Sum trichlorobenzenes | <0.10 | µg/L |
| Sum tri+ tetrachloroethene | <0.50 | µg/L |
| Sum xylenes | <1.00 | µg/L |
| Total non-purgeable organic carbon | 0.8 | mg/L |
| Total P | <10 | µg/L |
| Tritium | <5.0 | Bq/L |
| Zn | <2.0 | µg/L |
